# Supplementary material for: Major Genic Factors Influencing Nitrogen Response in Rice Revealed Through in-silico Characterization and Expression Dynamics of a Set of Novel Candidate Genes
Source: Research Square preprint supplement (doi:10.21203/rs.3.rs-7064296/v1), 2025-07-16
Supplement: Supplementary file 1 [file 1a6ad0380fed488e5ee16e56.docx]

**S. Table 1: List of primers used for gene expression**

| SN | **Gene id** | Primer | Tm | Length | Primer Sequence |
| --- | --- | --- | --- | --- | --- |
| G1 | **Os04g0382800** | Forward | 58.28 | 22 | CAGGAAACGGGTGAAGAACTAC |
|  |  | Reverse | 58.49 | 21 | CTTGTGACACGATGAACCCAG |
| G2 | **Os06g0240001** | Forward | 58.44 | 18 | TGGTGGTCGTGGCAACTG |
|  |  | Reverse | 58.66 | 18 | TGTCACCAGTCGCCAACG |
| G3 | **Os09g0392666** | Forward | 61.13 | 19 | ATTCCCACCGGAGGAAAGC |
|  |  | Reverse | 62.06 | 18 | CGCTCTCGATTTGCCGCT |
| G4 | **Os11g0577866** | Forward | 57.17 | 18 | CATCGCCGACGTATCGAT |
|  |  | Reverse | 56 | 19 | GGTTGTTGCGTTCCAATTC |
| G5 | **Os01g0756900** | Forward | 59.89 | 22 | CGAACACCACAGAGAGAGTCCA |
|  |  | Reverse | 60.14 | 18 | GGAGAGCCAAGGCCTTGG |
| G6 | **Os02g0527950** | Forward | 56.71 | 18 | ATTGCACTTGGTGGGTGC |
|  |  | Reverse | 58.68 | 18 | GCCGAGGAGCTGAACTGC |
| G7 | **Os03g0412850** | Forward | 59.78 | 22 | ATCTTGAGGTAGATCGCCTCGT |
|  |  | Reverse | 59.83 | 18 | CGCGACGGTCCGTACAAT |
| G8 | **Os03g0133875** | Forward | 59.23 | 18 | TGGTTTACCATCTCCCCG |
|  |  | Reverse | 55.98 | 22 | CTTATCAAAGGGCCTGTAAGTA |
| G9 | **Os01g0824500** | Forward | 56.15 | 20 | GCAGTTCCATGCTAAAGCTG |
|  |  | Reverse | 55.27 | 21 | TTCATTACCTAAACGGAGCAG |
| G10 | **Os03g0764125** | Forward | 57.69 | 18 | GCTGCTGCTCGTCACGAC |
|  |  | Reverse | 57.83 | 22 | TAGCGGATATAACAAGTCGTCG |
| G11 | **Os03g0818050** | Forward | 62 | 23 | TGGACGTCATAATTTGTGGTAGG |
|  |  | Reverse | 62 | 20 | TTTCCAATTGCAAGCCAACG |
| G12 | **Os04g0644433** | Forward | 61.48 | 19 | CGGCGATGTCCTTCACCAG |
|  |  | Reverse | 59.5 | 18 | GACACGTGCCCCATCGAC |
| G13 | **Os05g0170250** | Forward | 62.24 | 20 | TGGGTCGTCGTCGTGTTCAG |
|  |  | Reverse | 61.68 | 21 | ACGGCAAGTACTGGAAGGTCG |
| G14 | **Os09g0276000** | Forward | 61.33 | 20 | CTCGTTTACACGCATCTACC |
|  |  | Reverse | 61.3 | 17 | CGAGTGGGTCGACATCC |
| G15 | **Os01g0166800** | Forward | 60.7 | 23 | CCGTTCTCAATGCCACACCCTTG |
|  |  | Reverse | 62.5 | 21 | GGGACGACTCGCGTGTCCAAG |
| G16 | **Os06g0286400** | Forward | 56.4 | 23 | GGTGCTAGATTGGGCATCTCTTA |
|  |  | Reverse | 56.7 | 21 | AGAATGTCACAGGACGGAAGG |
| G17 | **Os06g0289200** | Forward | 61.3 | 20 | AGCTACTTGCCGTGGCTCGA |
|  |  | Reverse | 60.9 | 22 | GCTGCCGAAGCTGACGTAAACC |
| G18 | **Os06g0289900** | Forward | 60.14 | 23 | TGATGTCCCTCTGCTCCTACTTC |
|  |  | Reverse | 61.2 | 23 | TTCGTGAAGAGCTTGTTCAGGTC |
| G19 | **Os06g0290701** | Forward | 61.5 | 20 | CGAGCGGCAGCAGGTTGAAG |
|  |  | Reverse | 62.3 | 18 | TCCTCCCCACCGTGTCGG |
| G20 | **Os06g0291500** | Forward | 61.4 | 18 | CGTCGCTGGCTCCTCCTGC |
|  |  | Reverse | 61.9 | 19 | GCGCCTCCATGCTTGACCC |

**S. Table 2 : Target genes for the selected lncRNA**

| lncRNA | Chromosomal-location | sequence id | trageted_mRNAs | Gene ID | Target_description |
| --- | --- | --- | --- | --- | --- |
| Os02g0527950 | NC_029257.1:19339874-19350136 | 2 dna: :IRGSP-1.0:2:19344874:19345136:-1 | XM_015770319.2 | [**Os02g0527900**](https://plants.ensembl.org/Oryza_sativa/Gene/Summary?db=core;g=Os02g0527900;tl=tPYLGlIN8d3bUwPa-23975394-2741058213) | PAN domain-containing protein At5g03700 (LOC4329529), mRNA |
| Os02g0527950 | NC_029257.1:19344874-19345136 | 2 dna: :IRGSP-1.0:2:19344874:19345136:-1 | XM_015757279.2 | **Os10g0545700** | arsenate reductase 2.1-like (LOC4349283), mRNA |
| Os02g0527950 | NC_029257.1:19344874-19345136 | 2 dna: :IRGSP-1.0:2:19344874:19345136:-1 | XM_015777263.2 | [**Os03g0823301**](https://plants.ensembl.org/Oryza_sativa/Gene/Summary?db=core;g=Os03g0823301;tl=e2lNLw5B4vVloVTw-23975406-2741058613) | D-xylose-proton symporter-like 3, chloroplastic (LOC9271734), mRNA |
| Os03g0133875 | NC_029258.1:1892260-1892480 | 3 dna: :IRGSP-1.0:3:1892260:1892480:-1 | XM_015757279.2 | **Os10g0545700** | arsenate reductase 2.1-like (LOC4349283), mRNA |
| Os03g0133875 | NC_029258.1:1897260-1897480 | 3 dna: :IRGSP-1.0:3:1892260:1892480:-1 | XM_015774687.2 | **Os03g0133900** | probable serine acetyltransferase 2 (LOC4331528), mRNA |
| Os03g0818050 | NC_029258.1:34328245-34338481 | 3 dna: :IRGSP-1.0:3:34333245:34333481:1 | XM_015774360.2 | [**Os03g0818100**](https://plants.ensembl.org/Oryza_sativa/Gene/Summary?db=core;g=Os03g0818100;tl=TFPc0xddsbRmpAxE-23975463-2741063538) | multiple inositol polyphosphate phosphatase 1 (LOC4334577), mRNA |
| Os03g0818050 | NC_029258.1:34328245-34338481 | 3 dna: :IRGSP-1.0:3:34333245:34333481:1 | XM_015774367.2 | [**Os03g0818100**](https://plants.ensembl.org/Oryza_sativa/Gene/Summary?db=core;g=Os03g0818100;tl=TFPc0xddsbRmpAxE-23975463-2741063538) | protein FLX-like 1 (LOC4334576), mRNA |
| Os06g0286400 | NC_029261.1:10369591-10379893 | 6 dna: :IRGSP-1.0:6:10374591:10374893:1 | XM_015788421.2 | **Os06g0286500** | putative disease resistance RPP13-like protein 3 (LOC4340777), mRNA |
| Os06g0286400 | NC_029261.1:10374591-10374893 | 6 dna: :IRGSP-1.0:6:10374591:10374893:1 | XM_015788423.2 | **Os06g0286500** | protein NOI4 (LOC9270755), mRNA |

**S. Table 3: Annotation details of the selected 20 uncharacterized and low N-responsive rice genes as per the latest genome release versions**

|  | | | | | |
| --- | --- | --- | --- | --- | --- |
| **SN** | **Gene id** | **Rice** | ***Arabidopsis*** | **Maize** | ***Aegilops tauschii* (wheat D)** |
|  | **Gene name/putative function** | **Gene name/putative function** | **Gene name/putative function** | **Gene name/putative function** |
| **1** | **Os04g0382800** | **Uncharacterized protein LOC9269109** | **Putative golgin family A protein,** | **Uncharacterized protein At5g41620 isoform X1** | **Uncharacterized protein LOC109782440** |
| **2** | **Os06g0240001** | **N/A** | **N/A** | **N/A** | **N/A** |
| **3** | **Os09g0392666** | **N/A** | **N/A** | **N/A** | **N/A** |
| **4** | **Os11g0577866** | **Putative glucan endo-1,3-beta-glucosidase 8** | **O-Glycosyl hydrolases family 17 protein like** | **Uncharacterized protein LOC100272735 isoform 1 precursor** | **Uncharacterised Glucan endo-1,3-beta-glucosidase 8-like** |
| **5** | **Os01g0756900** | **Uncharacterized protein** | **N/A** | **N/A** | **N/A** |
| **6** | **Os02g0527950 (lncRNA)** | **N/A** | **N/A** | **N/A** | **N/A** |
| **7** | **Os03g0412850** | **Putative Glucose-6-phosphate 1-dehydrogenase, chloroplastic isoform X1** | **Putative glucose-6-phosphate dehydrogenase 2,** | **Putative glucose-6-phosphate 1-dehydrogenase** | **Putative glucose-6-phosphate 1-dehydrogenase, chloroplastic** |
| **8** | **Os03g0133875** | **N/A** | **N/A** | **N/A** | **N/A** |
| **(lncRNA)** |
| **9** | **Os01g0824500** | **Uncharacterized protein LOC107277763 isoform X1** | **Putative allergen-like protein, CHAL** | **Uncharacterized protein LOC100278334** | **Putative epidermal patterning factor-like protein 4** |
| **10** | **Os03g0764125** | **Putative Zinc Finger Protein 1** | **Putative salt tolerance zinc finger (STZ) protein,** | **Putative Zinc Finger Protein 1** | **Uncharacterized protein LOC109753323** |
| **11** | **Os03g0818050** | **N/A** | **N/A** | **N/A** | **N/A** |
| **(lncRNA)** |
| **12** | **Os04g0644433** | **N/A** | **N/A** | **N/A** | **N/A** |
| **13** | **Os05g0170250** | **Putative LRR receptor-like serine/threonine-protein kinase, GSO1** | **Putative Gassho1 (Leucine-rich repeat transmembrane protein kinase)** | **Putative LRR receptor-like serine/threonine-protein kinase GSO1,** | **Putative LRR receptor-like serine/threonine-protein kinase GSO1,** |
| **14** | **Os09g0276000** | **Putative premnaspirodiene oxygenase,** | **Putative Cytochrome P450, family 71, subfamily B, polypeptide 37,** | **Putative cytochrome P450 superfamily protein** | **Premnaspirodiene oxygenase-like** |
| **15** | **Os01g0166800** | **Putative mini-chromosome maintenance complex-binding protein,** | **E2F target protein 1 (ETG1) like protein** | **Uncharacterized protein LOC100279308** | **Putative mini-chromosome maintenance complex-binding protein** |
| **16** | **Os06g0286400** | **N/A** | **N/A** | **N/A** | **N/A** |
| **(lncRNA)** |
| **17** | **Os06g0289200** | **UDP-glucuronosyl/UDP-glucosyltransferase like family protein** | **UDP-glucosyl transferase 72E1 like protein** | **Uncharacterized protein LOC100191917 like 2-hydroxyflavanone C-glucosyltransferase** | **UDP-glucose:2-hydroxyflavanone C-glucosyltransferase-like protein** |
| **18** | **Os06g0289900** | **UDP-glucuronosyl/UDP-glucosyltransferase family like protein** | **UDP-glucosyl transferase 88A1 like protein** | **Anthocyanidin 3-O-glucosyltransferase like** | **UDP-glucose:2-hydroxyflavanone C-glucosyltransferase-like** |
| **19** | **Os06g0290701** | **N/A** | **N/A** | **N/A** | **N/A** |
| **20** | **Os06g0291500** | **Putative serine threonine kinase** | **Adenine nucleotide alpha hydrolases-like superfamily protein** | **Uncharacterized protein LOC100194230** | **Putative U-box domain-containing protein 35** |
